# Supplementary material for: Varying negative work assistance at the ankle with a soft exosuit during loaded walking
Source: PubMed Central journal article supplement (PMC5485681; doi:10.1186/s12984-017-0267-5), 2017-06-26
Supplement: 12984_2017_267_MOESM5_ESM.pdf [file 12984_2017_267_MOESM5_ESM.pdf]

| <b>Segment</b>              | <b>Weight</b> |
|-----------------------------|---------------|
| 2 boot attachments          | 136 g         |
| 4 gyroscopes                | 92 g          |
| Subtotal for foot segments  | 228 g         |
| 2 calf wraps                | 188 g         |
| 2 load cells                | 124 g         |
| 4 ankle straps              | 84 g          |
| Bowden cable sections       | 80 g          |
| Subtotal for shank segments | 476 g         |
| 1 waist belt                | 272 g         |
| 4 hip straps                | 85 g          |
| Subtotal for waist segment  | 356 g         |
| <b>Total Mass</b>           | <b>1060 g</b> |
