# Supplementary material for: Varying negative work assistance at the ankle with a soft exosuit during loaded walking
Source: PubMed Central journal article supplement (PMC5485681; doi:10.1186/s12984-017-0267-5), 2017-06-26

**A)**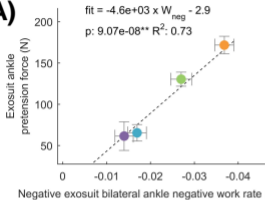**B)**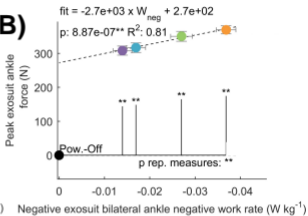**C)**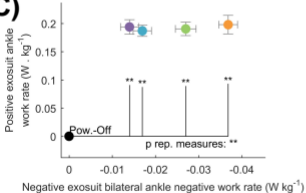

Supplement: 12984_2017_267_MOESM6_ESM.pdf [file 12984_2017_267_MOESM6_ESM.pdf]
