# Supplementary material for: Varying negative work assistance at the ankle with a soft exosuit during loaded walking
Source: Springer Nature journal article supplement (doi:10.1186/s12984-017-0267-5), 2017-06-26

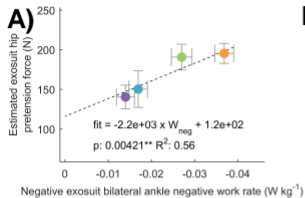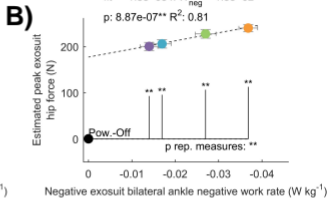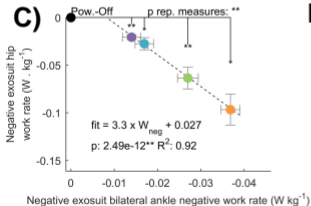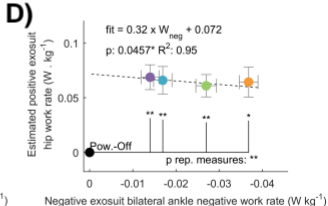

Supplement: MOESM7 [file 12477304]
